# Supplementary material for: Anticancer Potential of Sutherlandia frutescens and Xysmalobium undulatum in LS180 Colorectal Cancer Mini-Tumors
Source: PubMed Central journal article supplement (PMC7865898; doi:10.3390/molecules26030605), 2021-01-25
Supplement: molecules-26-00605-s001.pdf [file molecules-26-00605-s001.pdf]

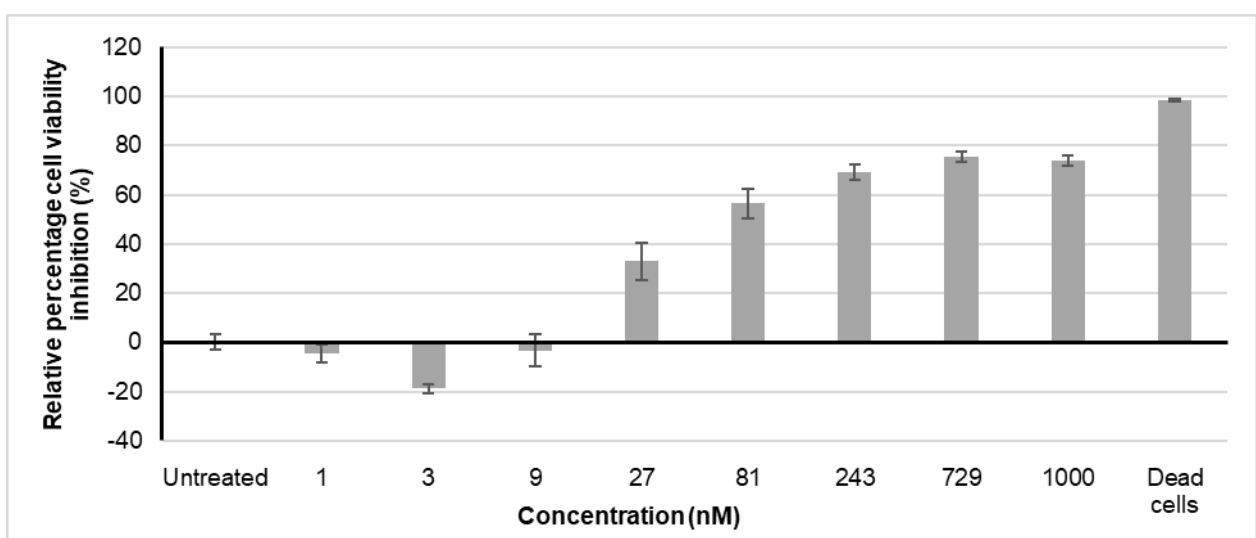

**Figure S1.** Percentage cell viability inhibition (IC) relative to an untreated control following 96 h of exposure to different concentration of paclitaxel on the LS180 cell line. ( $n = 6$ , error bars = standard deviation). The positive control consisted of cells treated with Triton X-100 (dead cells).

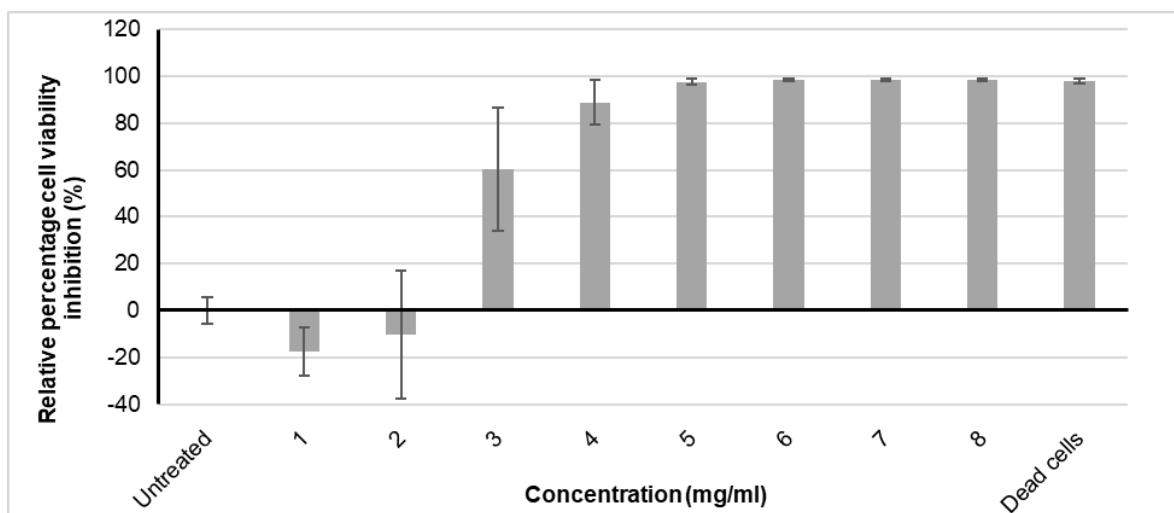

**Figure S2.** Percentage cell viability inhibition (IC) relative to an untreated control following 96 h of exposure to different concentration of *Sutherlandia frutescens* on the LS180 cell line. ( $n = 6$ , error bars = standard deviation). The positive control consisted of cells treated with Triton X-100 (dead cells).

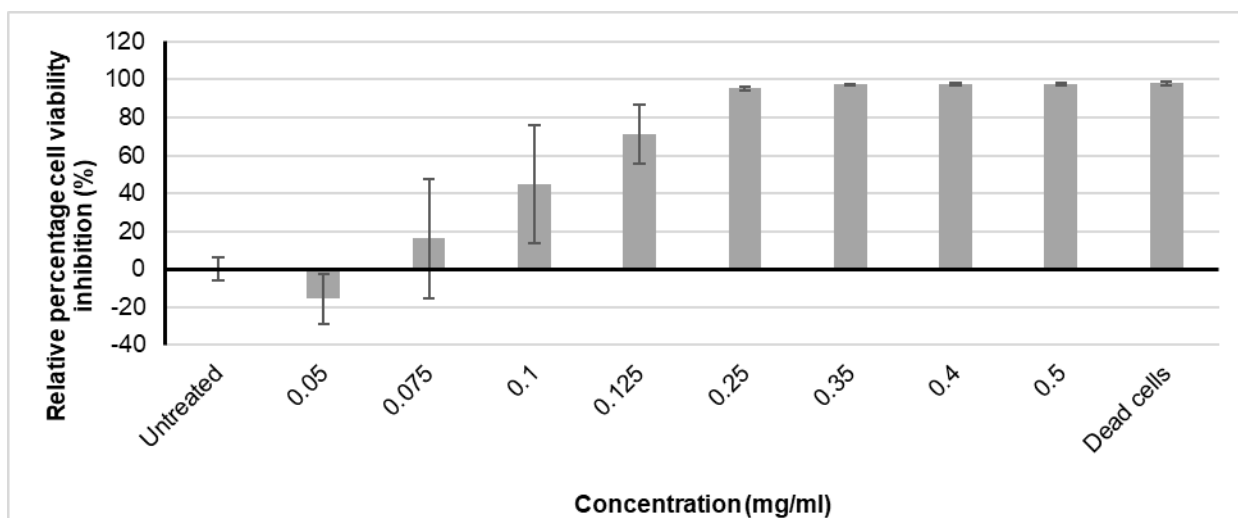

**Figure S3.** Percentage cell viability inhibition (IC) relative to an untreated control following 96 h of exposure to different concentration of *Xysmalobium undulatum* on the LS180 cell line. ( $n = 6$ , error bars = standard deviation). The positive control consisted of cells treated with Triton X-100 (dead cells).
